# Supplementary material for: MARCH5‐dependent NLRP3 ubiquitination is required for mitochondrial NLRP3‐NEK7 complex formation and NLRP3 inflammasome activation
Source: PubMed Central journal article supplement (PMC10548170; doi:10.15252/embj.2023113481), 2023-08-14
Supplement: EMBJ-42-e113481-s006.pdf [file EMBJ-42-e113481-s006.pdf]

# **MARCH5-dependent NLRP3 ubiquitination is required for mitochondrial NLRP3-NEK7 complex formation and NLRP3 inflammasome activation**

Yeon-Ji Park<sup>1,2¶</sup>, Niranjan Dodantenna<sup>3¶</sup>, Yonghyeon Kim<sup>1,2¶</sup>, Tae-Hwan Kim<sup>3</sup>, Ho-Soo Lee<sup>1</sup>, Young-Suk Yoo<sup>1</sup>, June Heo<sup>1,2</sup>, Jae-Ho Lee<sup>1</sup>, Myung-Hee Kwon<sup>4</sup>, Ho Chul Kang<sup>5</sup>, Jong-Soo Lee<sup>3\*</sup> and Hyeseong Cho<sup>1\*</sup>

## **Appendix**

Table of content

1. Appendix Figure S1                      page 2-3

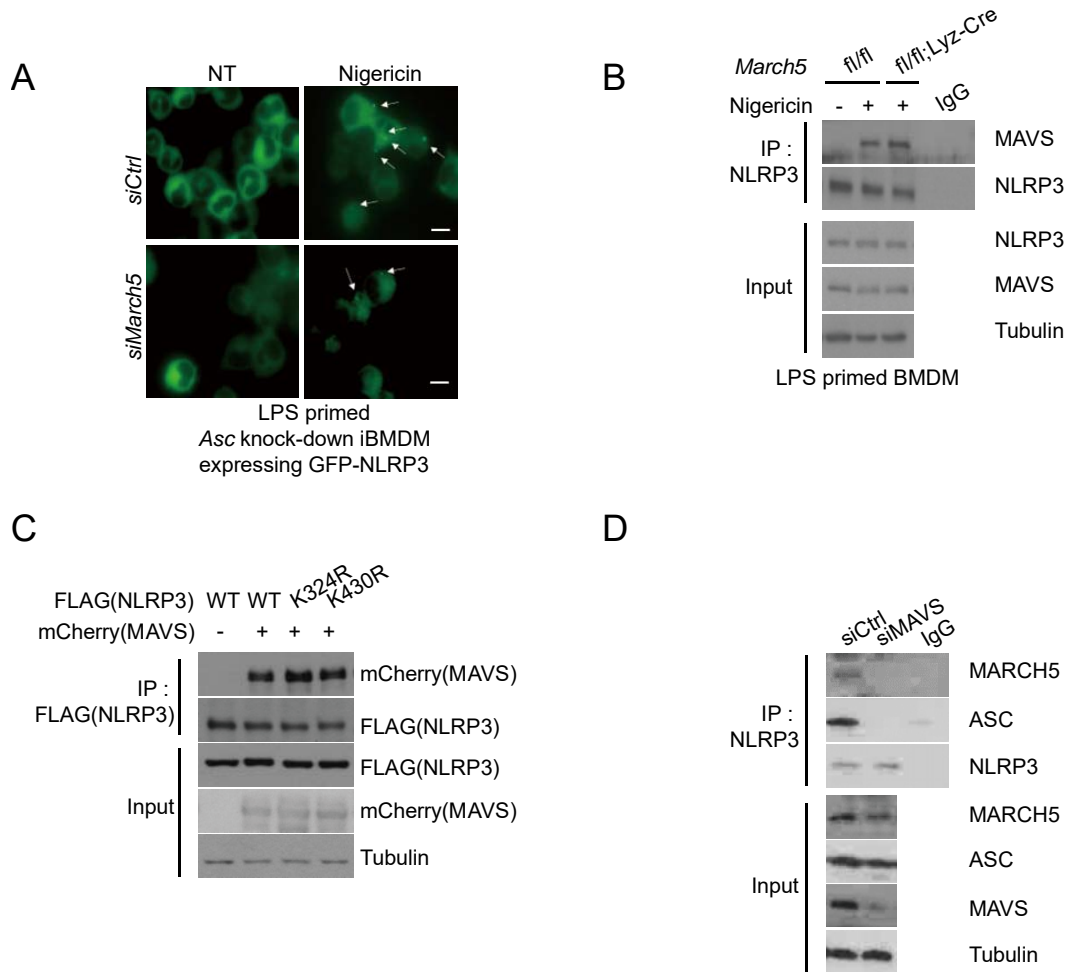

**Appendix Figure S1. MAVS is essential for NLRP3-ASC-MARCH5 complex formation.**

(A) Fluorescence microscopy images of NLRP3 oligomerization. *Asc* was knocked down in immortalized BMM and cells expressing GFP-NLRP3 as well as *siControl* or *siMarch5*. Cells were stimulated with 200 ng/ml LPS for 4 hr and 15  $\mu$ M nigericin for 30 min. White arrows indicate NLRP3 oligomerization. Bars, 10  $\mu$ m.

(B) *March5<sup>fl/fl</sup>* and *March5<sup>fl/fl;Lyz-Cre</sup>* BMDMs were stimulated with 200 ng/ml LPS for 4 hr and 5 mM ATP for 30 min.

(C) HEK293T cells were cotransfected with mCherry-MAVS and WT or mutant NLRP3. Cells were treated with 200 ng/ml LPS

and 15  $\mu$ M nigericin. Cell lysates were immunoprecipitated with FLAG-M2 beads. The proteins in the precipitate were analyzed by immunoblotting with the indicated antibodies.

(D) THP-1 cells were transfected with siControl and siMAVS. After stimulation with 200 ng/ml LPS for 4 hr and 5 mM ATP for 30 min, cell lysates were immunoprecipitated with NLRP3 antibody. The indicated proteins were detected with the corresponding antibodies.
